# Supplementary material for: Poly(ε-caprolactone)-graft-poly(2-(N, N-dimethylamino) ethyl methacrylate) nanoparticles: pH dependent thermo-sensitive multifunctional carriers for gene and drug delivery
Source: Royal Society of Chemistry journal article supplement (doi:10.1039/c0jm00506a), 2010-01-01
Supplement: c0jm00506a.pdf [file c0jm00506a.pdf]

## Supporting Information

**Poly( $\epsilon$ -caprolactone)-graft-poly(2-(*N*, *N*-dimethylamino) ethyl methacrylate)**

**Nanoparticles: pH Dependent Thermo-Sensitive Multifunctional Carriers for Gene and Drug Delivery**

Shutao Guo, Yong Qiao, Weiwei Wang, Haiyong He, Liandong Deng, Jinfeng Xing, Jianqing Xu, Xing-Jie Liang and Anjie Dong\*

Figure S1 shows the GPC spectra of macroinitiator P(CL-co-BMPCL) and PCL-g-PDMAEMA. The zeta potential of  $40.9 \pm 0.9$  mV in distilled water (Table S1) further indicates that the NPs are composed of PCL core and PDMAEMA shell.

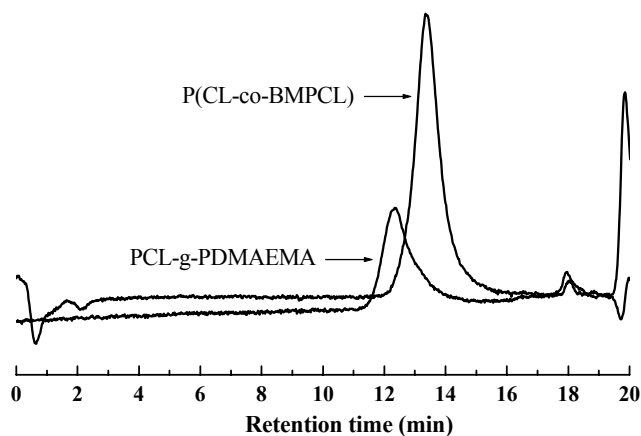

Figure S1. GPC spectra of P(CL-co-BMPCL) and PCL-g-PDMAEMA.

Table S1. Zeta potential of PCL-g-PDMAEMA NPs in distilled water

|                                           | pH=4.5       | pH=7.3       |
|-------------------------------------------|--------------|--------------|
| PCL-g-PDMAEMA NPs                         | 50.4±1.77 mv | 40.8±0.94 mv |
| PCL-g-PDMAEMA NPs/DNA (N/P=10)            | 18.9±0.9 mv  | 15.6±0.7 mv  |
| 4.70% paclitaxel-loaded PCL-g-PDMAEMA NPs | 43.0±4.32 mv | 36.5±1.39 mv |
| 12.5% paclitaxel-loaded PCL-g-PDMAEMA NPs | 42.5±2.41 mv | 33.6±0.60 mv |

Figure S2 is the plot of  $I_{338}/I_{333}$  (from pyrene excitation spectra) as a function of PCL-g-PDMAEMA concentration in distilled water solution. The measured CAC of PCL-g-PDMAEMA is about  $8.1 \times 10^{-4}$  g/L in pH=7.4 aqueous solution, which is 100 times lower than that of corresponding diblock copolymers.

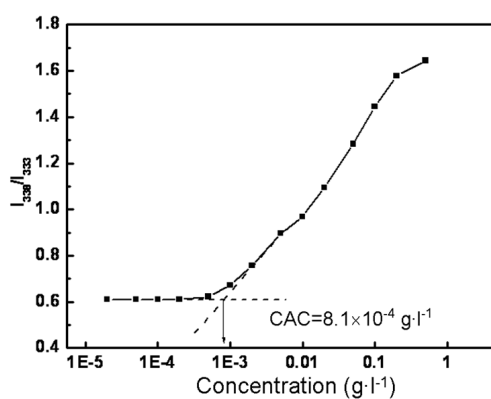

Figure S2. Plot of  $I_{338}/I_{333}$  (from pyrene excitation spectra) vs concentration of PCL-g-PDMAEMA22 in distilled water solution.

Figure S3 shows the  $I_{338}/I_{333}$  values of PCL-g-PDMAEMA NPs (A, pH=7.3) and PCL-g-PDMAEMA NPs/DNA polyplex NPs (N/P=10) at different pH values (B). The  $I_{338}/I_{333}$  value is almost changeless with DNA binding. Therefore, we can conclude that PCL-g-PDMAEMA NPs remain their integrity during DNA binding process.

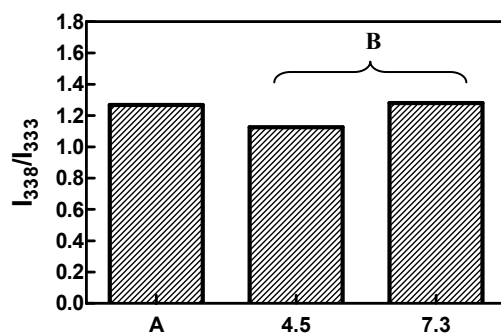

Figure S3.  $I_{338}/I_{333}$  values of PCL-g-PDMAEMA NPs (A, pH=7.3) and PCL-g-PDMAEMA NPs/DNA polyplex NPs (N/P=10) at different pH values (B).
